# Supplementary material for: Nd3+, Yb3+:YF3 Optical Temperature Nanosensors Operating in the Biological Windows
Source: MDPI journal article supplement (doi:10.3390/ma16010039), 2022-12-21
Supplement: s1 [file s1]

Supplementary information

# Nd<sup>3+</sup>, Yb<sup>3+</sup>:YF<sub>3</sub> optical temperature nanosensors operating in the biological windows

Maksim Pudovkin\*, Ekaterina Oleynikova, Airat Kiiamov, Mikhail Cherosov and Marat Gafurov\*

18<sup>th</sup> Kremlyovskaya street. Kazan 420008, Russian Federation, Institute of physics

\*Correspondence: M.P.\*, jaz7778@list.ru and M.G.\*\*\*, mgafurov@gmail.com

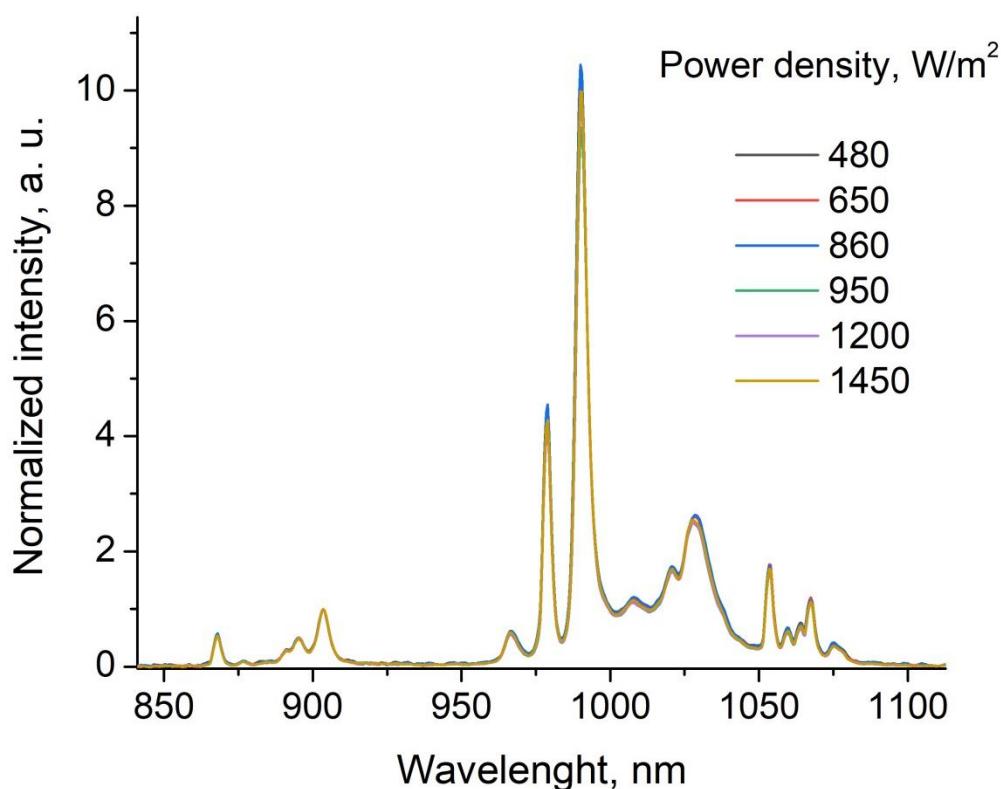

**Figure S1.** The luminescence spectra recorded at different values of power density of the laser irradiation. It can be seen, that the shape of the spectra are independent of the power density. It can be related to the lack of heating. We used the maximum power values around 300 mV that corresponds to ~ 1300 W/m<sup>2</sup>. These values are comparable to our previous work “<https://doi.org/10.1016/j.optmat.2021.111328>”.

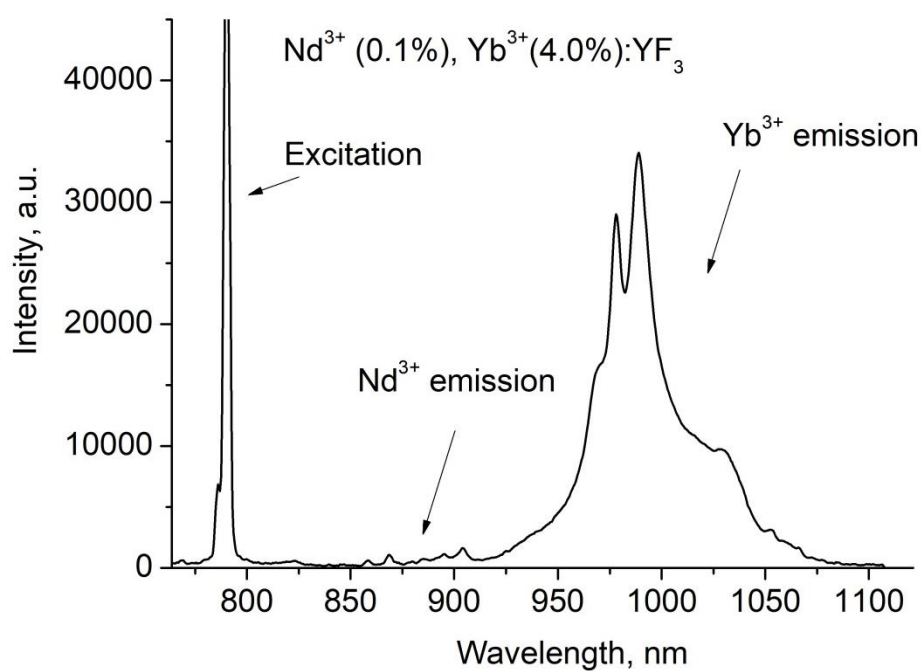

**Figure S2.** Room temperature luminescence spectrum of  $\text{Nd}^{3+}$ (0.1%),  $\text{Yb}^{3+}$ (3.0%): $\text{YF}_3$ . It can be seen, that the integrated intensity of  $\text{Yb}^{3+}$  much higher compared to  $\text{Nd}^{3+}$  one. This peculiarity leads to deterioration of the performances.
